# Supplementary material for: Hydrodynamic and ultrasonic cavitation physically modifies the milk protein concentrates with improved functionality
Source: Royal Society of Chemistry journal article supplement (doi:10.1039/d5fb00393h), 2025-12-03
Supplement: d5fb00393h1.pdf [file d5fb00393h1.pdf]

Supplementary file

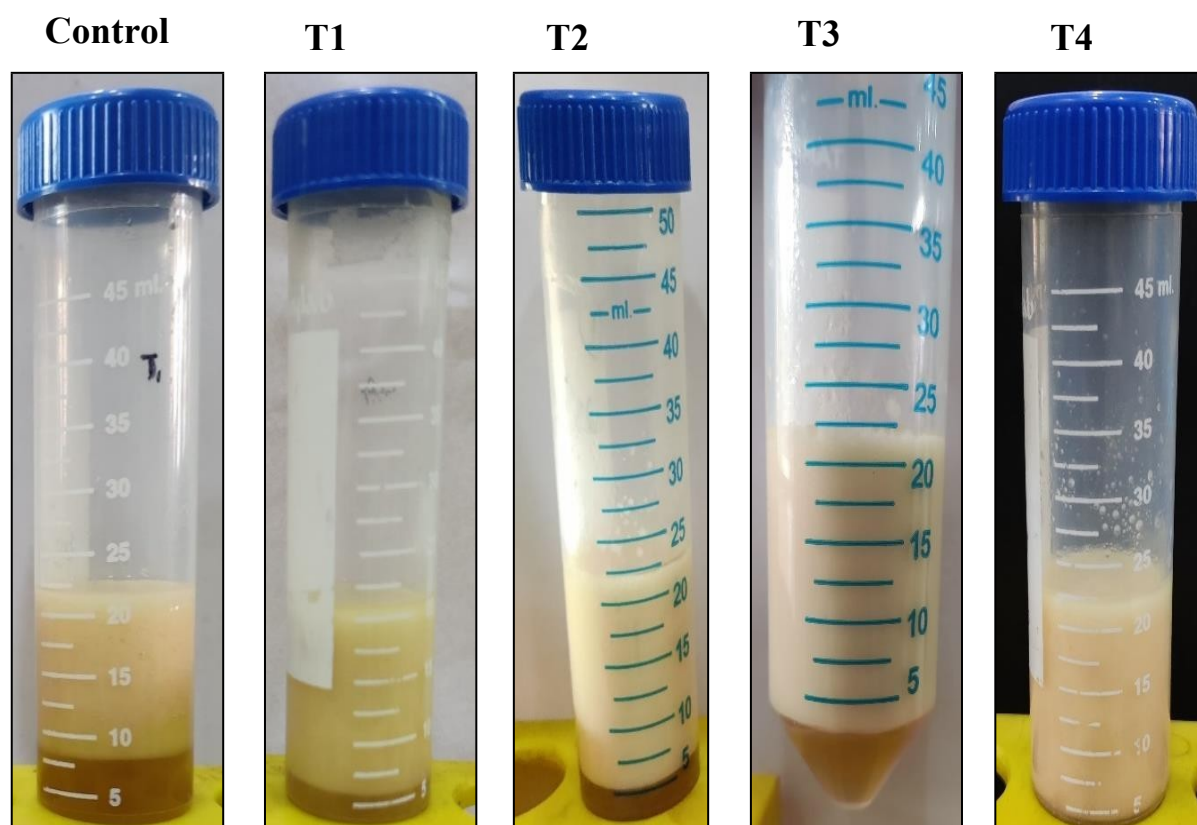

**Fig. S1.** Effect of 600 W power ultrasound at variable times ranging from 0 to 30 min on the Emulsifying Activity in 10% w/v MPC. Control, T1, T2, T3, and T4 represent 0, 5, 10, 20, and 30 minutes of Ultrasonic Processing time respectively.

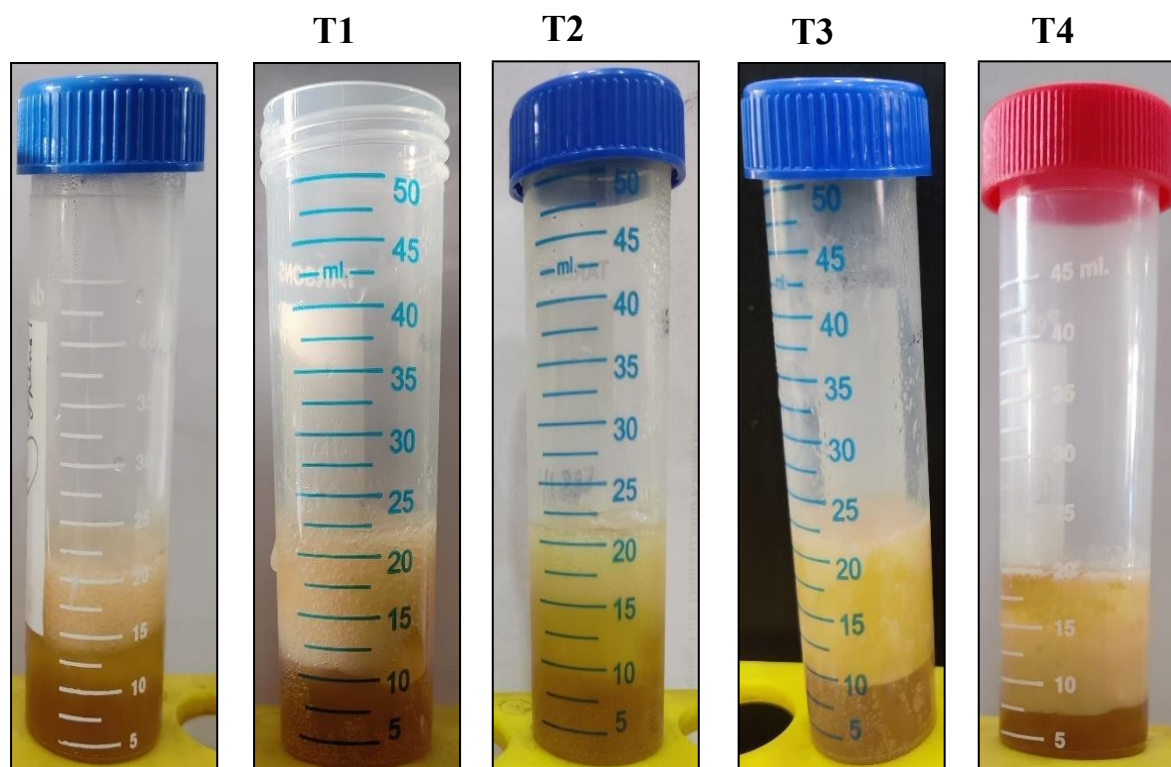

**Control**

**Fig. S2.** Effect of 600Wt Power Ultrasound at variable times ranging from 0 to 30 min on the Emulsifying Stability in 10% w/v MPC where Control, T1, T2, T3, T4 represents 0, 5, 10, 20, and 30 mins of Ultrasonic Processing time respectively

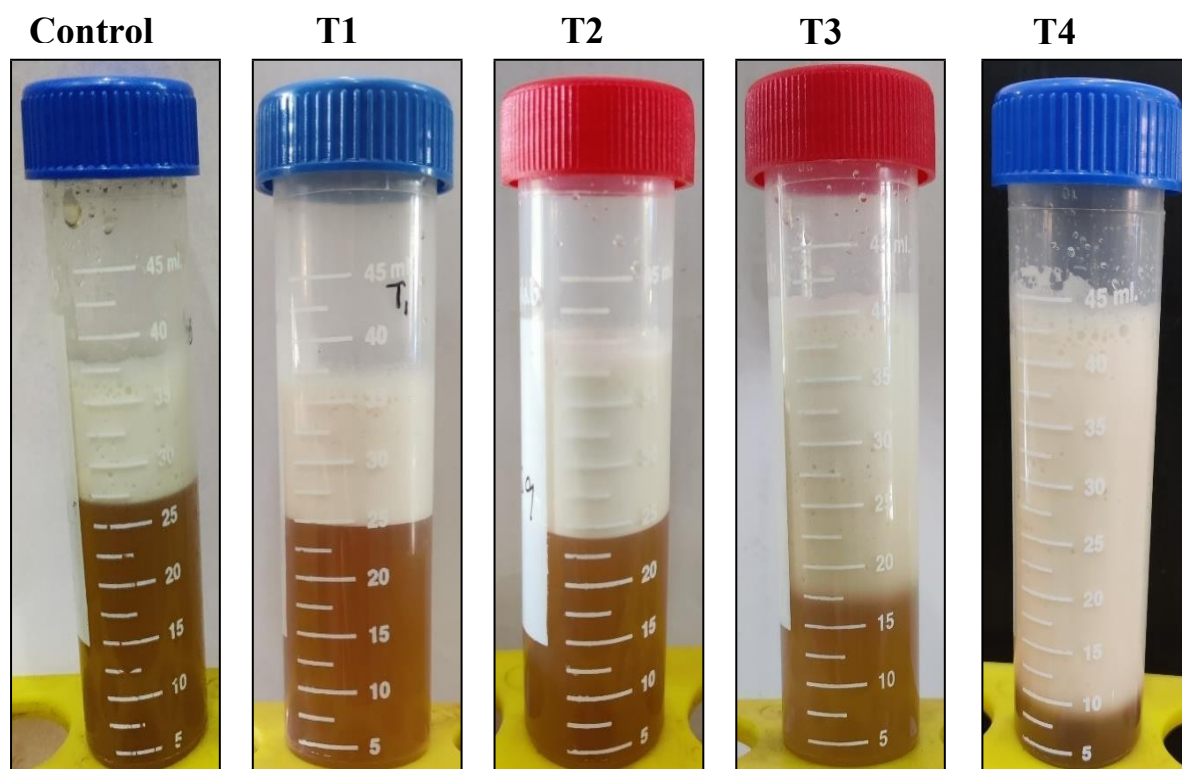

**Fig. S3.** Effect of 600 Wt. Power Ultrasound at variable times ranging from 1 to 30 min on the Foaming Capacity 10% w/v MPC. where Control, T1, T2, T3, T4 represents 0, 5, 10, 20 and 30 mins of Ultrasonic Processing time respectively

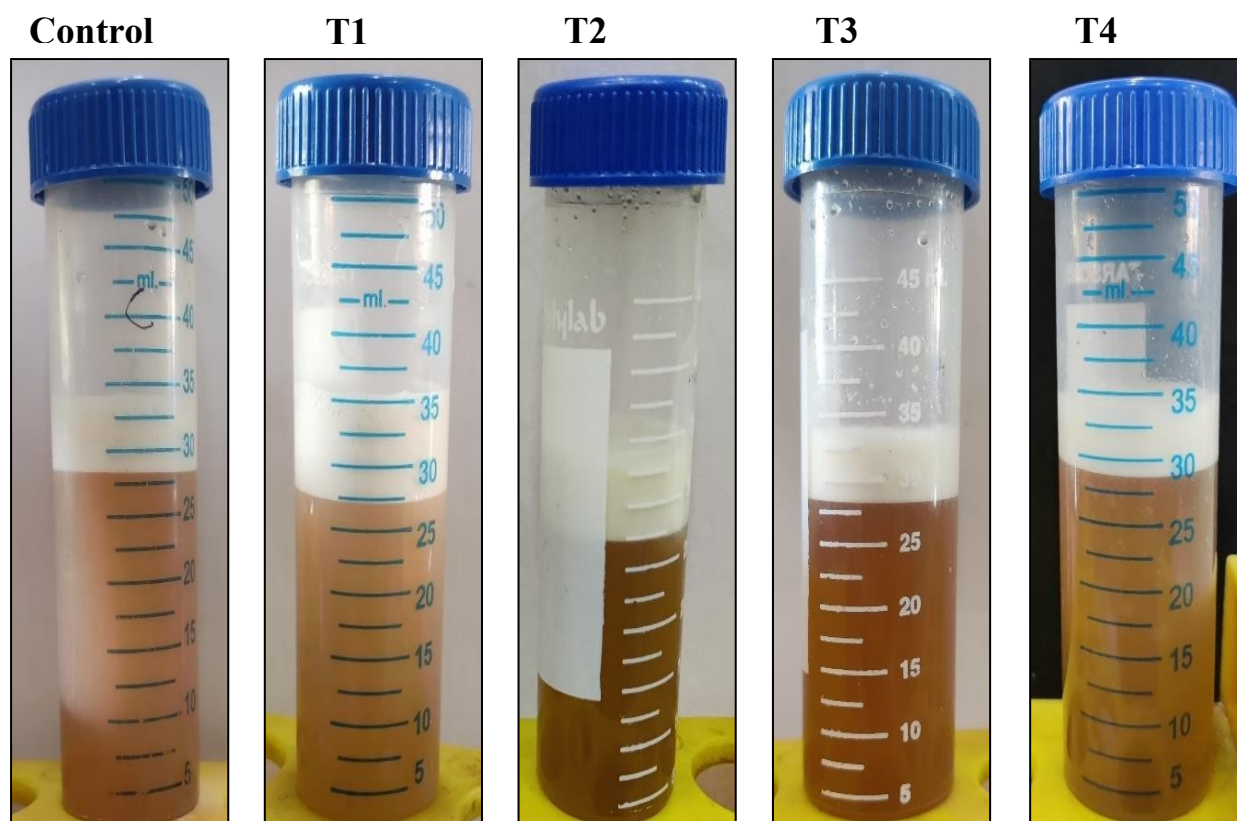

**Fig. S4.** Effect of 600Wt Power Ultrasound a variable time ranging from 0 to 30 min on the Foaming stability in 10% w/v MPC where Control, T1, T2, T3, T4 represents 0, 5, 10, 20, and 30 mins of Ultrasonic Processing time respectively

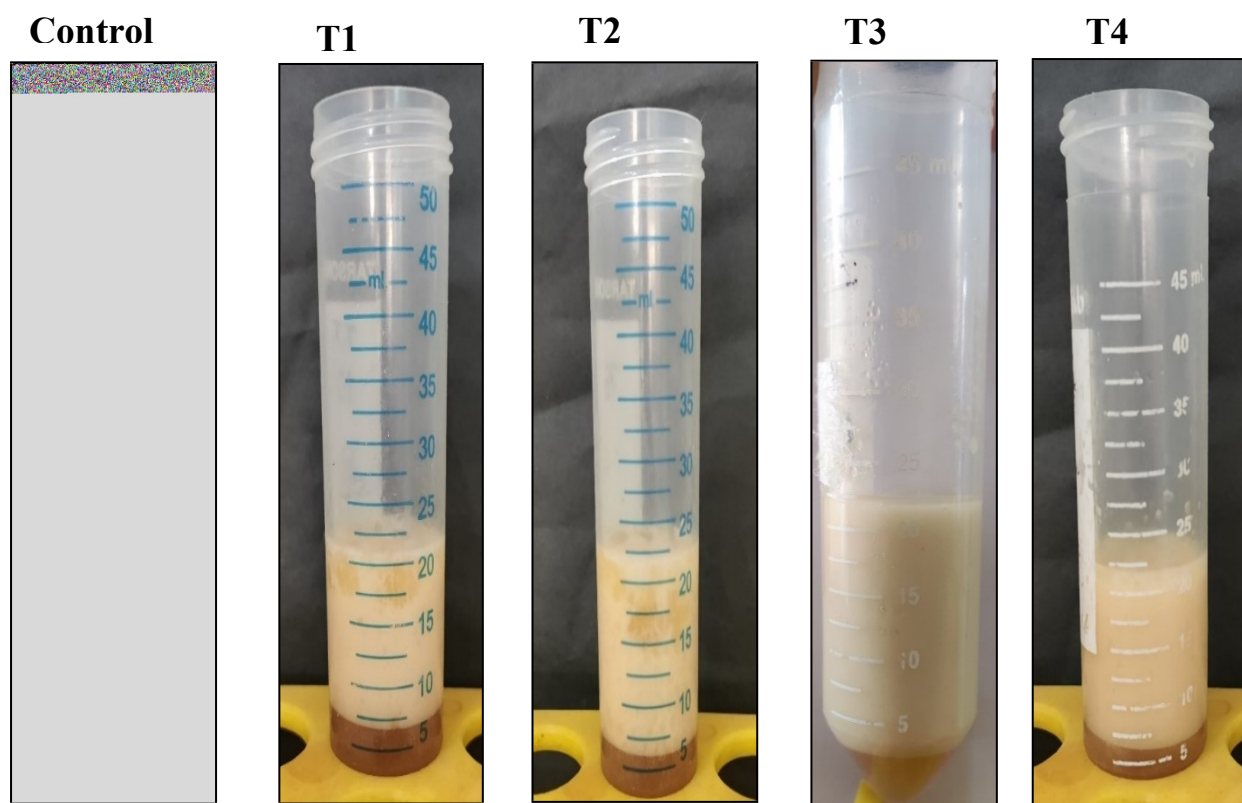

**Fig. S5.** Effect of 6MPa Pressure Power Hydrodynamic cavitation at variable times ranging from 0 to 30 min on the Emulsifying Activity in 10% w/v MPC where Control, T1, T2, T3, T4 represents 0, 5, 10, 20 and 30 mins of Cavitation Processing time respectively



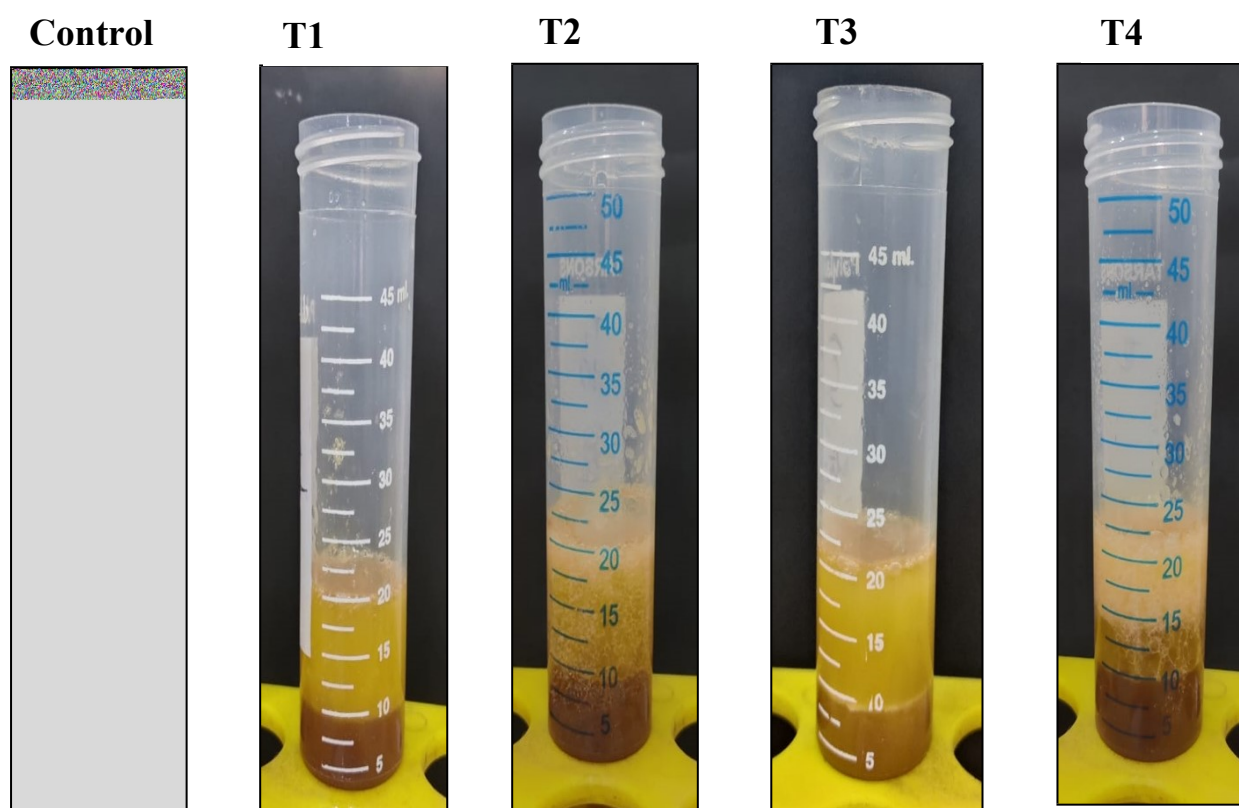

**Fig. S6.** Effect of 6MPa Pressure Power Hydrodynamic cavitation at variable times ranging from 0 to 30 min on the Emulsifying Stability in 10% w/v MPC where Control, T1, T2, T3, T4 represents 0, 5, 10, 20 and 30 mins of cavitation Processing time respectively

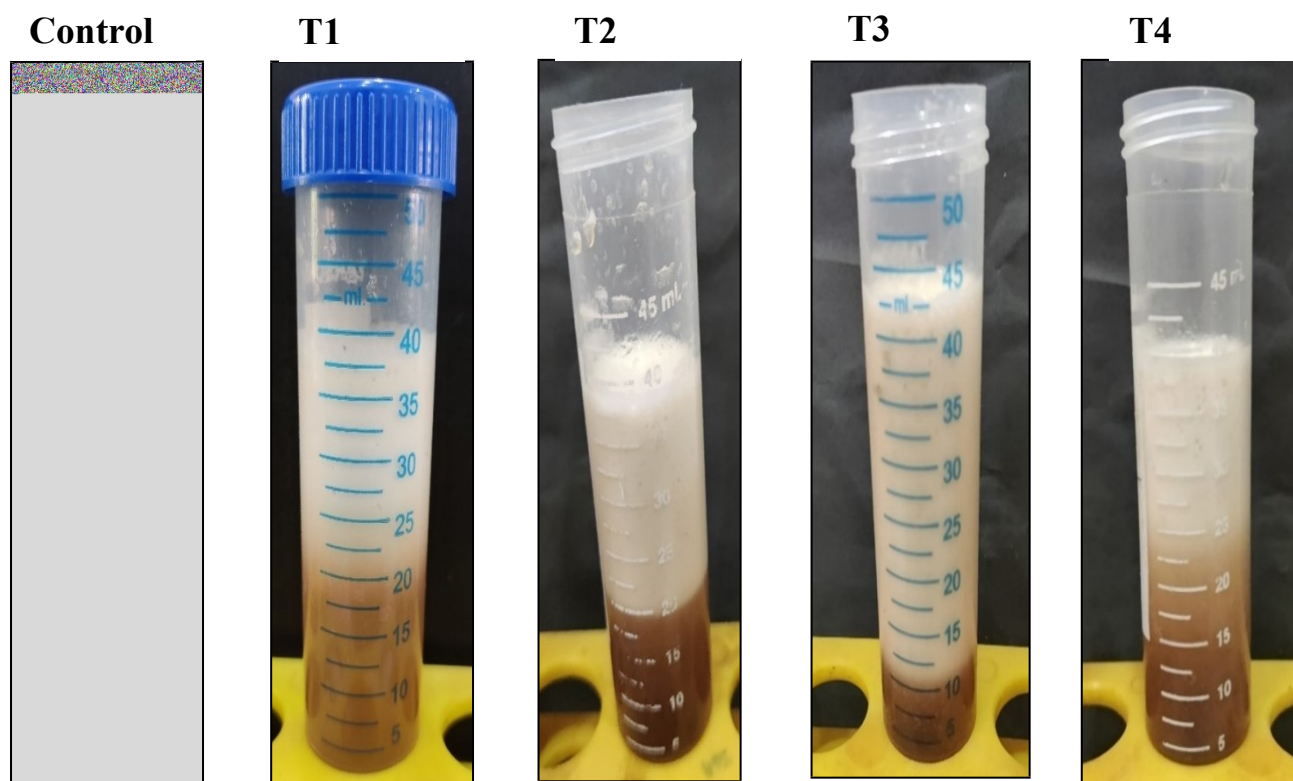

**Fig. S7.** Effect of 6MPa Pressure Power Hydrodynamic cavitation at variable times ranging from 0 to 30 min on the foaming activity 10% w/v MPC where Control, T1, T2, T3, T4 represents 0, 5, 10, 20 and 30 mins of cavitation Processing time respectively

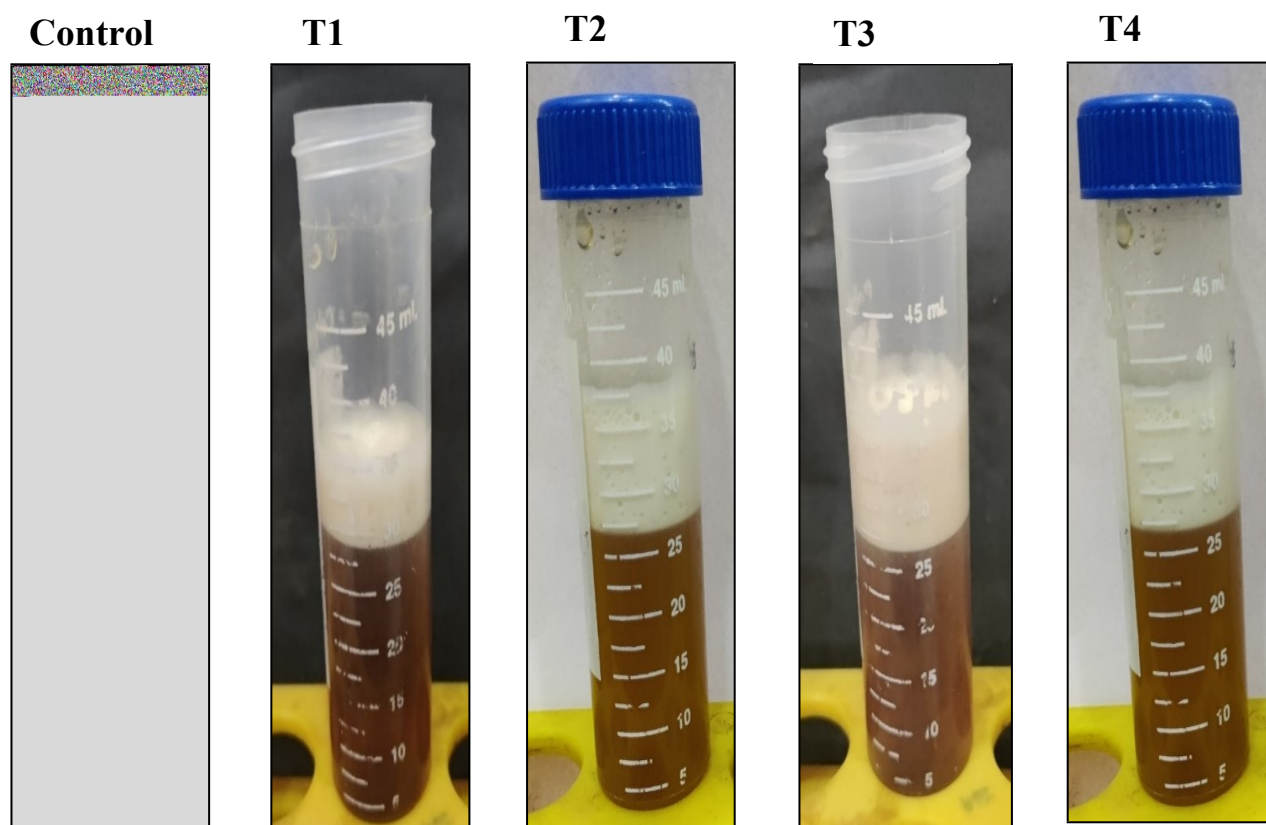

**Fig. S8.** Effect of 6MPa Pressure Power Hydrodynamic Cavitation at variable times ranging from 0 to 30 min on foaming stability in 10% w/v MPC where Control, T1, T2, T3, T4 represents 0, 5, 10, 20 and 30 mins of cavitation Processing time respectively



**Table S1-** Effect of Ultrasonic Cavitation at 20 kHz on the Physical properties of 10% w/v MPC at 600 Wt. power and variable time ranging from 0 to 30 Min

| Trail          | Power (Wt) | Time (Min) | Emulsifying Activity (%) | % of the change in EA | Emulsifying Stability (%) | Foaming Capacity (%)     | % of the change in FA | Foaming Stability (%)    |
|----------------|------------|------------|--------------------------|-----------------------|---------------------------|--------------------------|-----------------------|--------------------------|
| <b>Control</b> | 0          | 0          | 42.13±0.15 <sup>c</sup>  | --                    | 46.76±0.25 <sup>d</sup>   | 20.83±0.28 <sup>d</sup>  | --                    | 40.76±0.25 <sup>a</sup>  |
| <b>1</b>       | 600        | 5          | 54.93±0.11 <sup>d</sup>  | 31                    | 52.93±0.11 <sup>b</sup>   | 21.00±0.28 <sup>d</sup>  | 2                     | 30.73±0.23 <sup>bc</sup> |
| <b>2</b>       | 600        | 10         | 75.06±0.05 <sup>c</sup>  | 81                    | 51.40±0.34 <sup>c</sup>   | 35.53±0.51 <sup>c</sup>  | 80                    | 31.66±0.28 <sup>bc</sup> |
| <b>3</b>       | 600        | 20         | 91.46±0.50 <sup>a</sup>  | 110                   | 53.21±0.34 <sup>b</sup>   | 86.53±0.54 <sup>b</sup>  | 200                   | 24.66±1.15 <sup>d</sup>  |
| <b>4</b>       | 600        | 30         | 86.11±0.17 <sup>b</sup>  | 102                   | 56.22±0.26 <sup>a</sup>   | 112.53±0.52 <sup>a</sup> | 250                   | 19.93±0.11 <sup>e</sup>  |

Results are expressed as Mean ± Standard deviation. Different lowercase letters indicate significant differences in each column and for each treatment ( $p < 0.05$ ).

**Table S2-** Effect of Hydrodynamic Cavitation on the Physical properties of 10% w/v MPC at 6MPa pressure and different time

| Trail          | Pressure (MPa) | Time (Min) | Emulsifying Activity (%) | % of Change in EA | Emulsifying Stability (%) | Foaming Activity (%)    | % of Change in FA | Foaming Stability (%)   |
|----------------|----------------|------------|--------------------------|-------------------|---------------------------|-------------------------|-------------------|-------------------------|
| <b>Control</b> | 0              | 0          | 42±0.52 <sup>d</sup>     | --                | 47.06±0.20 <sup>d</sup>   | 19.7±0.26 <sup>e</sup>  | --                | 41.2±0.17 <sup>a</sup>  |
| <b>1</b>       | 6              | 5          | 55.66±0.57 <sup>c</sup>  | 22                | 53.83±1 <sup>c</sup>      | 24.83±0.76 <sup>d</sup> | 20                | 35.66±0.57 <sup>b</sup> |
| <b>2</b>       | 6              | 10         | 75.54±0.54 <sup>b</sup>  | 85                | 56.5±0.51 <sup>b</sup>    | 45.5±0.54 <sup>c</sup>  | 102               | 34.83±0.76 <sup>b</sup> |
| <b>3</b>       | 6              | 20         | 93.16±0.28 <sup>a</sup>  | 112               | 54.5±0.52 <sup>c</sup>    | 93.83±0.76 <sup>a</sup> | 250               | 30.83±0.28 <sup>c</sup> |
| <b>4</b>       | 6              | 30         | 76.51±0.50 <sup>b</sup>  | 86                | 58.83±0.76 <sup>a</sup>   | 79.54±0.53 <sup>b</sup> | 190               | 33.66±0.57 <sup>c</sup> |

Results are expressed as Mean ± Standard deviation. Different lowercase letters indicate significant differences in each column and for each treatment ( $p < 0.05$ ).
